# Supplementary material for: Exploring the potential energy surface of small lead clusters using the gradient embedded genetic algorithm and an adequate treatment of relativistic effects
Source: Royal Society of Chemistry journal article supplement (doi:10.1039/c7ra11449d), 2017-12-20
Supplement: c7ra11449d1.pdf [file c7ra11449d1.pdf]

## – Electronic Supplementary Information –

### Exploring the Potential Energy Surface of Small Lead Clusters using the Gradient Embedded Genetic Algorithm and an Adequate Treatment of Relativistic Effects

Walter A. Rabanal-León,<sup>a,1</sup> Edison Osorio,<sup>b</sup> William Tiznado,<sup>a</sup> Franklin Ferraro<sup>b,2</sup>

<sup>a</sup> *Departamento de Ciencias Químicas, Facultad Ciencias Exactas, Universidad Andrés Bello, Av. República 275, Santiago, Chile.*

<sup>b</sup> *Departamento de Ciencias Básicas, Universidad Católica Luis Amigó, Transversal 51A 67B 90, Medellín, Colombia.*

E-mail: [w.rabanalleon@uandresbello.edu](mailto:w.rabanalleon@uandresbello.edu),<sup>1</sup> [franklin.ferrarogo@amigo.edu.co](mailto:franklin.ferrarogo@amigo.edu.co)<sup>2</sup>

- 
- **Figure ESI-1.** The lowest energy isomers of  $Pb_n$  ( $n = 3-10$ ) clusters at scalar (SR) and spin-orbit (SO) schemes.
  - **Figure ESI-2.** Convergence of SR-isomers towards to SO-isomer for  $Pb_3$ ,  $Pb_6$ ,  $Pb_7$  and  $Pb_8$ .
  - **Figure ESI-3.** Molecular orbital diagram for  $Pb_8$  system calculated at PBE0/TZ2P-SR and PBE0/TZ2P-SO levels of theory.
  - **Figure ESI-4.** Binding energy (BE), HOMO-LUMO gap and Second Order Difference in Total Energy behaviors calculated using the GGA-PBE/Def2-TZVP methodology.
  - **Table ESI-1.** Cartesians coordinates and relative energies for  $Pb_n$  ( $n = 3 - 10$ ) isomers.
  - **Table ESI-2.** HOMO-LUMO gap for  $Pb_n$  ( $n = 3 - 10$ ) isomers. Energy in eV.
-

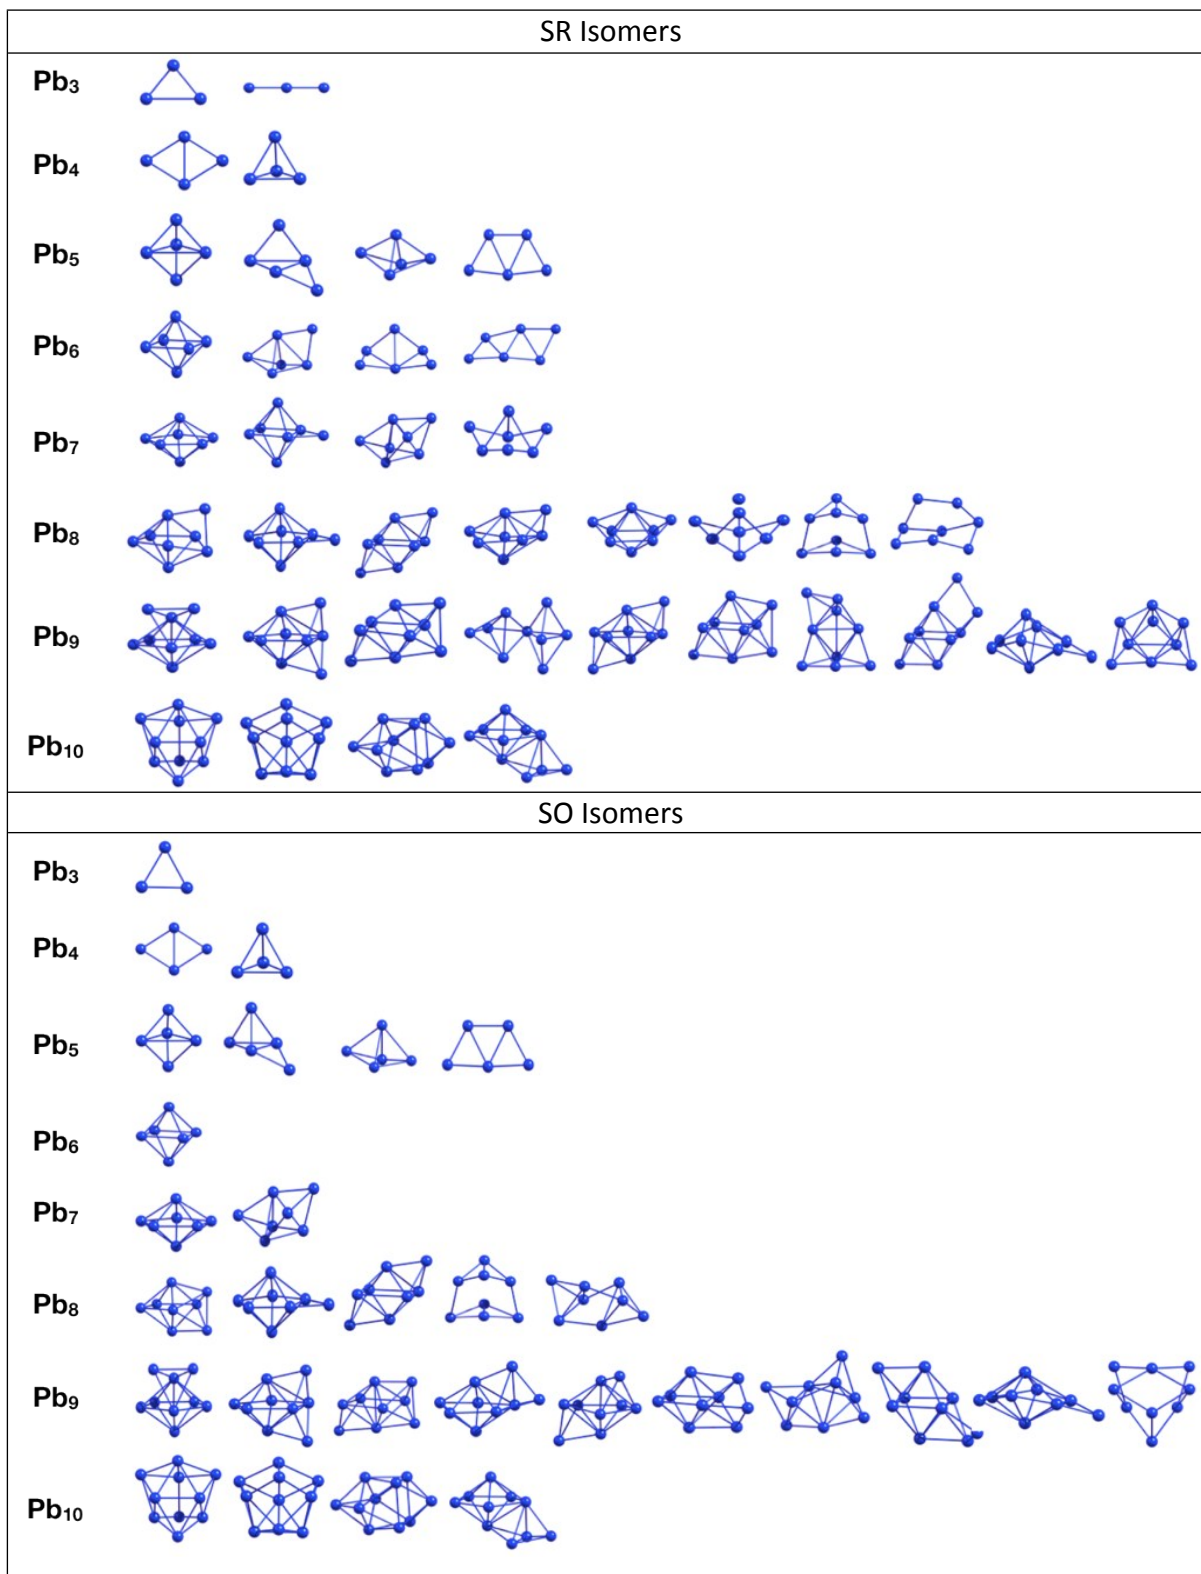

**Figure ESI-1.** The lowest energy isomers of  $\text{Pb}_x$  ( $x = 3 - 10$ ) clusters at scalar (SR) and spin-orbit (SO) schemes.

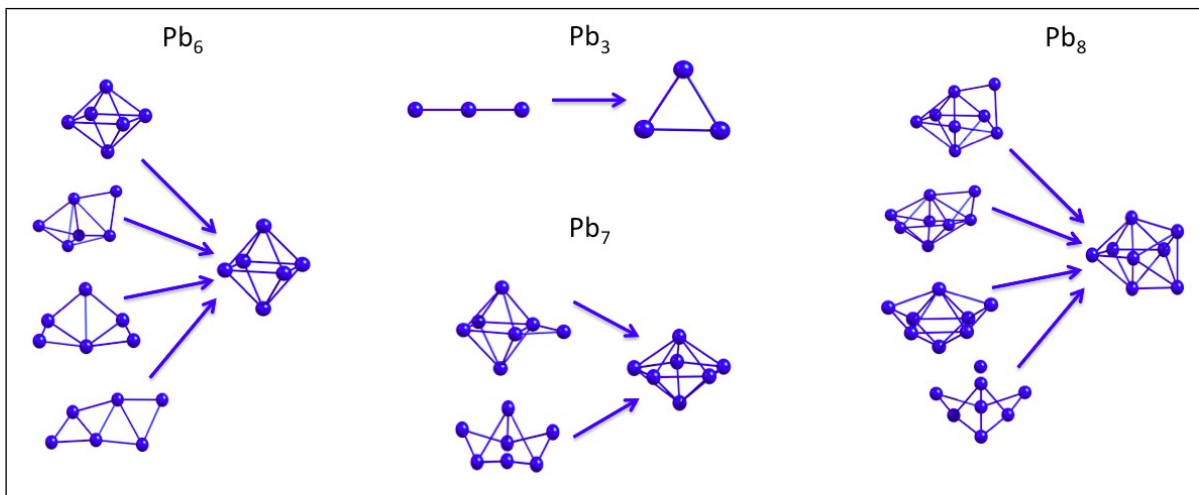

**Figure ESI-2.** Convergence of SR-isomers towards to SO-isomer.

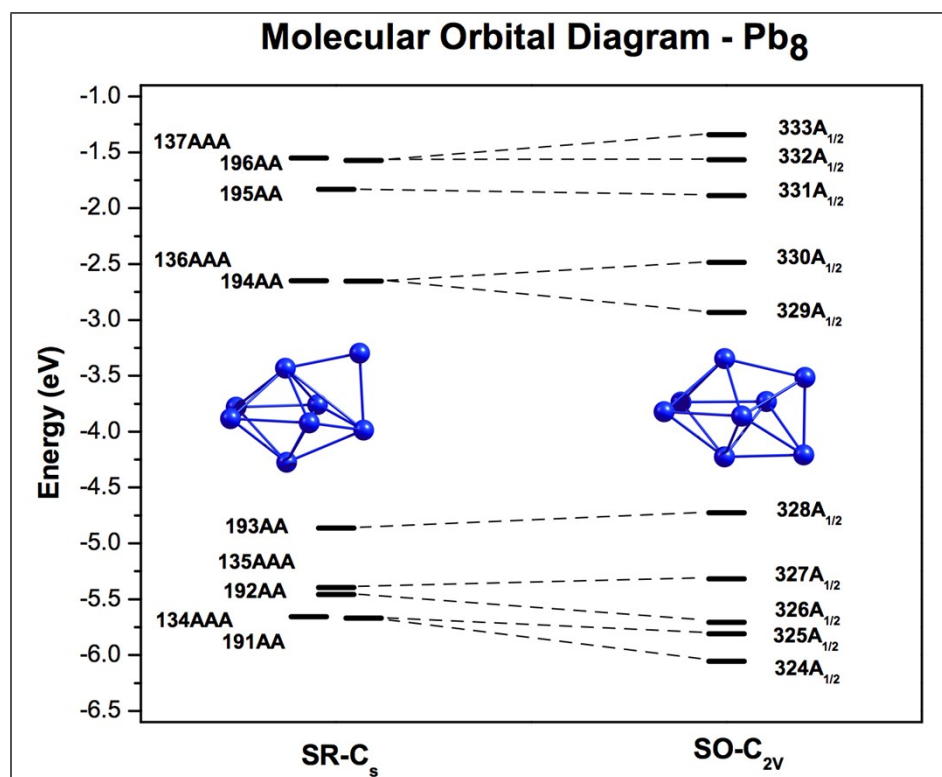

**Figure ESI-3.** Molecular orbital diagram for  $Pb_8$  system calculated at PBE0/TZ2P-SR and PBE0/TZ2P-SO levels of theory.

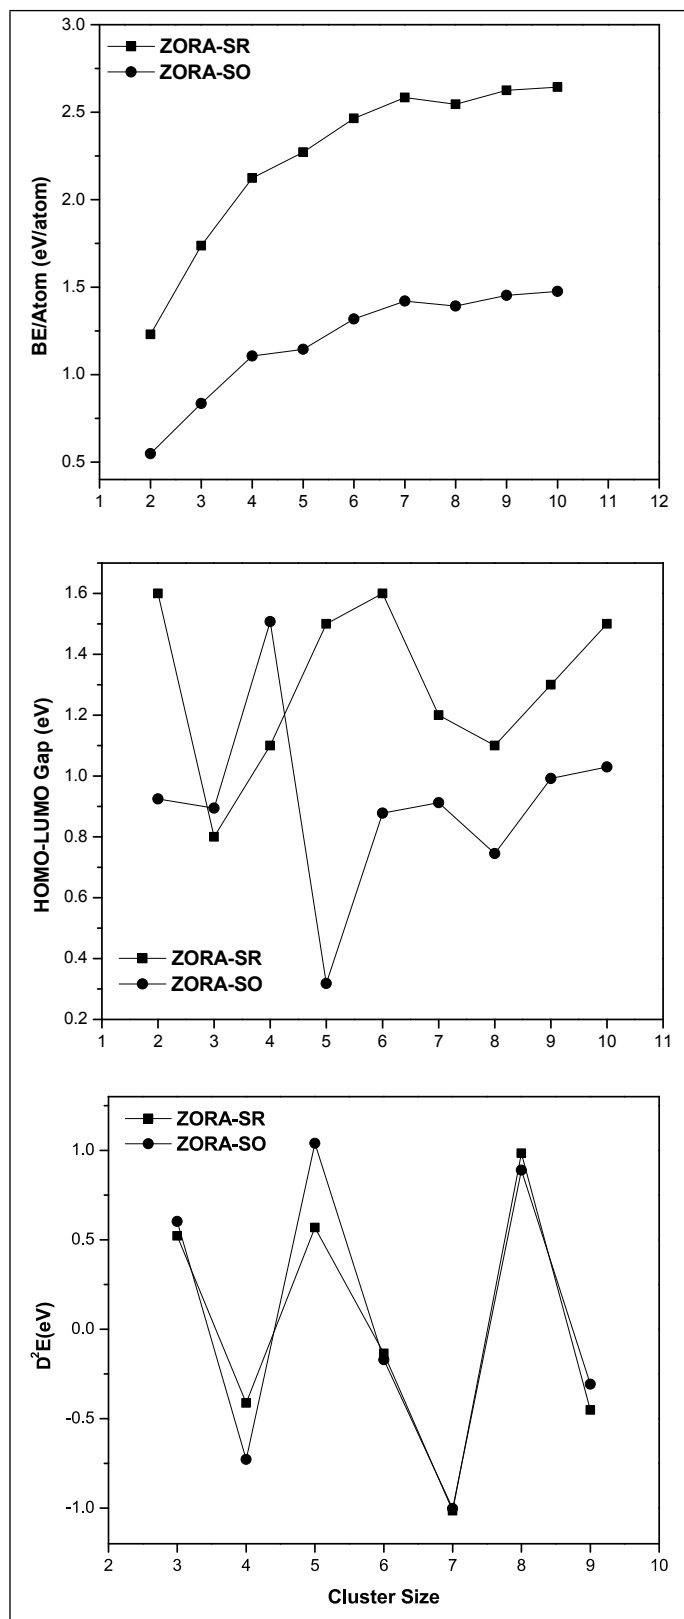

**Figure ESI-4.** Binding energy (BE), HOMO-LUMO gap and Second Order Difference in Total Energy behaviors calculated using the GGA-PBE/Def2-TZVP methodology.









|      |                                           |      |                                           |      |                                           |
|------|-------------------------------------------|------|-------------------------------------------|------|-------------------------------------------|
|      | 82 -1.171371000 -1.974439000 0.537388000  |      | 82 -1.170445000 -1.944123000 -0.466558000 |      | 82 -1.015869000 1.761999000 -1.198026000  |
|      | 82 -1.210235000 1.445657000 1.437495000   |      | 82 -1.175375000 0.560688000 1.927038000   |      | 82 2.044478000 0.000133000 -1.189164000   |
|      | 82 0.313165000 3.014993000 -0.810509000   |      | 82 0.340649000 3.013629000 0.740362000    |      | 82 1.559860000 -2.718081000 0.347444000   |
|      | 82 2.022363000 -1.794276000 0.487332000   |      | 82 1.989384000 -1.793829000 -0.452625000  |      | 82 -0.938412000 1.621016000 2.015972000   |
|      | 82 2.006688000 0.485521000 -1.802703000   |      | 82 1.976149000 1.276680000 -1.345350000   |      | 82 -0.937910000 -1.619934000 2.014703000  |
|      | 82 0.327989000 -0.790732000 3.016284000   |      | 82 0.350493000 -2.142310000 2.240532000   |      | 82 1.559714000 2.717911000 0.348837000    |
| 1.0  | 82 2.387616000 0.244902000 -0.169543000   | 0.7  | 82 -2.305682000 -0.505010000 -0.172597000 | 4.5  | 82 -2.440332000 -0.534280000 -0.152429000 |
|      | 82 0.832359000 1.715189000 2.165111000    |      | 82 -0.616892000 -1.767847000 2.146267000  |      | 82 -0.621389000 -1.782114000 2.123528000  |
|      | 82 1.166122000 -1.494181000 2.178042000   |      | 82 -1.307340000 1.361943000 2.138351000   |      | 82 -1.314598000 1.369862000 2.116373000   |
|      | 82 1.716658000 -2.450757000 -1.310615000  |      | 82 -2.000723000 2.243931000 -1.268175000  |      | 82 -2.013075000 2.258965000 -1.297109000  |
|      | 82 -3.029918000 -0.319285000 -1.204039000 |      | 82 2.982129000 0.653028000 -1.187156000   |      | 82 3.003958000 0.657724000 -1.226859000   |
|      | 82 -1.782034000 -0.177067000 2.278841000  |      | 82 1.756127000 0.393407000 2.231418000    |      | 82 1.764204000 0.395256000 2.216949000    |
|      | 82 -1.414637000 1.927949000 -0.050908000  |      | 82 1.594914000 -1.719419000 -0.065740000  |      | 82 1.688429000 -1.816131000 -0.039761000  |
|      | 82 -0.070245000 -0.013481000 -2.529240000 |      | 82 0.048911000 -0.000425000 -2.497597000  |      | 82 0.045087000 -0.000343000 -2.416117000  |
|      | 82 -0.985857000 -2.175588000 -0.035903000 |      | 82 0.721329000 2.222828000 -0.077328000   |      | 82 0.766342000 2.353526000 -0.054088000   |
|      | 82 1.179936000 2.742319000 -1.321746000   |      | 82 -0.872773000 -2.882436000 -1.247443000 |      | 82 -0.878627000 -2.902464000 -1.270488000 |
| 3.6  | 82 1.341736000 -1.743929000 1.638235000   | 1.1  | 82 1.345042000 -1.720434000 1.606289000   | 0.0  | 82 1.350000000 -1.655500000 1.631600000   |
|      | 82 1.340560000 1.741819000 1.639551000    |      | 82 1.342881000 1.709652000 1.612179000    |      | 82 1.349200000 1.648700000 1.640700000    |
|      | 82 -1.318037000 0.001630000 -1.929007000  |      | 82 -1.311247000 0.006256000 -1.886396000  |      | 82 -1.352500000 0.005200000 -2.291500000  |
|      | 82 3.403128000 0.001393000 -0.001868000   |      | 82 3.397845000 0.003138000 -0.009003000   |      | 82 3.491700000 0.001100000 -0.009100000   |
|      | 82 1.339098000 1.743081000 -1.638632000   |      | 82 1.330246000 1.719073000 -1.608629000   |      | 82 1.338500000 1.655400000 -1.637200000   |
|      | 82 1.339622000 -1.743600000 -1.638851000  |      | 82 1.332738000 -1.707780000 -1.612616000  |      | 82 1.340100000 -1.646300000 -1.646700000  |
|      | 82 -3.596512000 -0.000228000 0.001897000  |      | 82 -3.588113000 0.001065000 0.011154000   |      | 82 -3.488400000 -0.001900000 0.009500000  |
|      | 82 -1.266909000 2.617694000 0.001743000   |      | 82 -1.279372000 2.581758000 0.011985000   |      | 82 -1.346500000 2.368800000 0.009100000   |
|      | 82 -1.267976000 -2.616337000 -0.000554000 |      | 82 -1.277295000 -2.583545000 -0.006487000 |      | 82 -1.344400000 -2.370000000 -0.002800000 |
|      | 82 -1.314710000 -0.001523000 1.927485000  |      | 82 -1.292726000 -0.009183000 1.881524000  |      | 82 -1.337700000 -0.005500000 2.296500000  |
| 18.1 | 82 3.090186000 -1.586207000 -0.743899000  | 13.9 | 82 3.083850000 -1.574942000 -0.725300000  | 12.3 | 82 3.165260000 -1.597082000 -0.717312000  |
|      | 82 0.485784000 -2.635701000 0.601211000   |      | 82 0.477998000 -2.603881000 0.600688000   |      | 82 0.485634000 -2.615202000 0.624557000   |
|      | 82 -4.092310000 -0.001390000 0.418410000  |      | 82 -4.088509000 -0.000109000 0.413041000  |      | 82 -4.210262000 0.018438000 0.409894000   |
|      | 82 -2.129406000 1.768605000 -1.117190000  |      | 82 -2.118837000 1.727145000 -1.108005000  |      | 82 -2.163819000 1.734823000 -1.104314000  |
|      | 82 0.483390000 -0.001101000 -1.479890000  |      | 82 0.502393000 0.000090000 -1.428863000   |      | 82 0.517764000 -0.006485000 -1.462909000  |
|      | 82 -1.239510000 0.002703000 1.665710000   |      | 82 -1.239066000 -0.000272000 1.617586000  |      | 82 -1.256618000 -0.009397000 1.630429000  |
|      | 82 0.483496000 2.636999000 0.597810000    |      | 82 0.477427000 2.603737000 0.601134000    |      | 82 0.479028000 2.613742000 0.617174000    |
|      | 82 -2.129014000 -1.770395000 -1.115790000 |      | 82 -2.118599000 -1.727321000 -1.108162000 |      | 82 -2.161898000 -1.738506000 -1.091117000 |
|      | 82 1.957090000 0.000495000 1.916110000    |      | 82 1.940132000 0.000101000 1.863655000    |      | 82 1.995204000 0.008399000 1.832892000    |
|      | 82 3.090294000 1.585993000 -0.742490000   |      | 82 3.083213000 1.575453000 -0.725772000   |      | 82 3.150207000 1.591269000 -0.739291000   |



**Table ESI-2.** HOMO-LUMO gap for Pb<sub>n</sub> (n = 3 - 10) isomers. Energy in eV at PBE0 level of theory.

|      | ISOMERS  | LANL2DZ-SR | DEF2TZVP-SR | ZORA-SR/TZ2P | CRENBL-SO   | ZORA-SO/TZ2P |
|------|----------|------------|-------------|--------------|-------------|--------------|
| Pb3  | Isomer01 | 1.95       | 1.88 (0.72) | 1.88 (0.75)  | 2.10 (0.78) | 2.24 (0.89)  |
|      | Isomer02 | 1.88       | 1.89 (0.89) | 1.87 (0.89)  |             |              |
| Pb4  | Isomer01 | 2.35       | 2.36 (1.12) | 2.37 (1.23)  | 2.52 (1.48) | 2.73 (1.50)  |
|      | Isomer02 | 1.74       | 1.80 (0.68) | 1.81 (0.67)  | 2.01 (0.78) | 2.11 (0.84)  |
| Pb5  | Isomer01 | 2.74       | 2.66 (1.48) | 2.71 (1.50)  | 1.30 (0.29) | 1.37 (0.29)  |
|      | Isomer02 | 2.19       | 2.21 (0.97) | 2.22 (0.97)  | 2.00 (0.86) | 2.11 (0.98)  |
|      | Isomer03 | 1.38       | 1.38 (0.24) | 1.38 (0.24)  | 1.41 (0.21) | 1.51 (0.24)  |
|      | Isomer04 | 0.96       | 1.02 (0.12) | 1.02 (0.12)  | 1.80 (0.61) | 1.87 (0.67)  |
| Pb6  | Isomer01 | 2.73       | 2.73 (1.56) | 2.72 (1.56)  | 1.81 (0.83) | 1.91 (0.88)  |
|      | Isomer02 | 2.30       | 2.32 (1.15) | 2.32 (1.15)  | 1.81 (0.83) | 1.91 (0.88)  |
|      | Isomer03 | 2.06       | 1.94 (0.91) | 1.96 (0.88)  | 1.81 (0.83) | 1.91 (0.88)  |
|      | Isomer04 | 1.91       | 1.80 (0.75) | 1.82 (0.74)  | 1.81 (0.83) | 1.91 (0.88)  |
| Pb7  | Isomer01 | 2.47       | 2.46 (1.24) | 2.44 (1.25)  | 1.94 (0.78) | 2.02 (0.91)  |
|      | Isomer02 | 2.03       | 2.11 (1.01) | 2.11 (0.99)  | 1.94 (0.78) | 2.02 (0.91)  |
|      | Isomer03 | 1.80       | 1.78 (0.63) | 1.77 (0.63)  | 1.48 (0.50) | 1.65 (0.56)  |
|      | Isomer04 | 2.70       | 2.64 (1.53) | 2.11 (1.51)  | 1.94 (0.78) | 2.02 (0.91)  |
| Pb8  | Isomer01 | 2.20       | 2.21 (1.09) | 2.21 (1.10)  | 1.68 (0.80) | 1.79 (0.81)  |
|      | Isomer02 | 1.90       | 1.89 (0.84) | 1.89 (0.82)  | 1.26 (0.38) | 1.40 (0.43)  |
|      | Isomer03 | 1.85       | 1.88 (0.78) | 1.90 (0.80)  | 1.48 (0.51) | 1.61 (0.56)  |
|      | Isomer04 | 1.49       | 1.35 (0.32) | 1.35 (0.34)  | 1.68 (0.80) | 1.79 (0.81)  |
|      | Isomer05 | 1.78       | 1.75 (0.67) | 1.76 (0.68)  | 1.68 (0.80) | 1.79 (0.81)  |
|      | Isomer06 | 1.69       | 1.65 (0.61) | 1.65 (0.60)  | 1.68 (0.80) | 1.79 (0.81)  |
|      | Isomer07 | 1.72       | 1.66 (0.60) | 1.66 (0.59)  | 1.36 (0.39) | 1.41 (0.43)  |
|      | Isomer08 | 1.48       | 1.43 (0.45) | 1.44 (0.46)  | 1.75 (0.73) | 1.84 (0.79)  |
| Pb9  | Isomer01 | 2.42       | 2.42 (1.29) | 2.42 (1.30)  | (0.92)      | (0.99)       |
|      | Isomer02 | 2.07       | 2.04 (0.98) | 2.03 (0.98)  | (0.60)      | (0.62)       |
|      | Isomer03 | 1.88       | 1.92 (0.86) | 1.92 (0.87)  | (0.62)      | (0.64)       |
|      | Isomer04 | 1.80       | 1.74 (0.70) | 1.74 (0.69)  | (0.53)      | (0.57)       |
|      | Isomer05 | 1.77       | 1.76 (0.77) | 1.75 (0.77)  | (0.65)      | (0.70)       |
|      | Isomer06 | 1.58       | 1.56 (0.53) | 1.56 (0.54)  | (0.40)      | (0.45)       |
|      | Isomer07 | 2.25       | 2.22 (1.10) | 2.21 (1.10)  | (0.89)      | (0.93)       |
|      | Isomer08 | 1.89       | 1.98 (1.02) | 1.98 (1.02)  | (0.52)      | (0.59)       |
|      | Isomer09 | 1.96       | 1.91 (0.93) | 1.91 (0.93)  | (0.85)      | (0.90)       |
|      | Isomer10 | 1.78       | 1.74 (0.66) | 1.74 (0.68)  | (0.47)      | (0.52)       |
| Pb10 | Isomer01 | 2.53       | 2.56 (1.45) | (1.46)       | (0.95)      | (1.03)       |
|      | Isomer02 | 2.67       | 2.71 (1.58) | (1.59)       | (0.91)      | (0.96)       |
|      | Isomer03 | 1.90       | 1.99 (0.92) | (0.94)       | (0.56)      | (0.61)       |
|      | Isomer04 | 1.87       | 1.84 (0.76) | (0.74)       | (0.62)      | (0.68)       |
